# Supplementary material for: Six-Week Actual Use Study to Evaluate the Impact of Oral Tobacco-Derived Nicotine Pouches on Cigarette Smoking and Smokeless Tobacco Product Use Behaviors
Source: Research Square preprint supplement (doi:10.21203/rs.3.rs-951433/v2), 2022-02-24
Supplement: Supplementary file 1 [file 2c8b64b35b204f32473a0110.docx]

Additional file 2. Percentage of participants using each nicotine level of the Test Products each week

a)

b)

c)

Additional File 2 legend: This figure depicts the percentage of participants who reported using each nicotine level of the Test Products each week during the 6-week extended use period.
