# Supplementary material for: Six-Week Actual Use Study to Evaluate the Impact of Oral Tobacco-Derived Nicotine Pouches on Cigarette Smoking and Smokeless Tobacco Product Use Behaviors
Source: Research Square preprint supplement (doi:10.21203/rs.3.rs-951433/v2), 2022-02-24
Supplement: Supplementary file 2 [file 3833427a16ac5b754a88eb1c.docx]

Additional File 7. Weekly prevalence of cigarettes, smokeless tobacco, and other tobacco products

a)

b)

c)

Additional File 7 Legend: This figure depicts the percentage of participants who reported using each type of tobacco product each week during the 6-week extended use period.
