# Supplementary material for: Six-Week Actual Use Study to Evaluate the Impact of Oral Tobacco-Derived Nicotine Pouches on Cigarette Smoking and Smokeless Tobacco Product Use Behaviors
Source: Research Square preprint supplement (doi:10.21203/rs.3.rs-951433/v2), 2022-02-24
Supplement: Supplementary file 3 [file 45fe0b98a4ccaaed7f7713b5.docx]

Additional file 5. Descriptive statistics for Test Products used per week by flavor

|  | Week 1 | Week 2 | Week 3 | Week 4 | Week 5 | Week 6 |
| --- | --- | --- | --- | --- | --- | --- |
| AS | | | | | | |
| Original | *n*=105 | *n*=91 | *n*=74 | *n*=71 | *n*=75 | *n*=66 |
| Mean (95% CI) | 14.33  (11.12, 17.54) | 14.81  (12.09, 17.53) | 13.19  (10.57, 15.82) | 15.57  (12.06, 19.08) | 15.88  (12.51, 19.26) | 19.22  (15.13, 23.31) |
| Standard Deviation | 16.79 | 13.25 | 11.52 | 15.10 | 14.91 | 16.96 |
| Median | 9.00 | 10.00 | 9.40 | 10.00 | 12.00 | 14.00 |
| Berry | *n*=256 | *n*=208 | *n*=207 | *n*=185 | *n*=191 | *n*=180 | |
| Mean (95% CI) | 18.04  (16.14, 19.95) | 18.75  (16.26, 21.24) | 18.32  (15.82, 20.83) | 19.58  (17.01, 22.15) | 20.54  (17.69, 23.39) | 21.00  (18.26, 23.75) | |
| Standard Deviation | 15.56 | 18.33 | 18.37 | 17.83 | 20.10 | 18.80 | |
| Median | 14.00 | 12.00 | 14.00 | 16.33 | 15.00 | 17.00 | |
| Cinnamon | *n*=163 | *n*=153 | *n*=146 | *n*=140 | *n*=134 | *n*=127 | |
| Mean (95% CI) | 17.49  (15.04, 19.95) | 16.75  (14.54, 18.96) | 17.97  (15.64, 20.29) | 18.18  (15.64, 20.72) | 18.56  (16.33, 20.80) | 22.20  (18.31, 26.10) | |
| Standard Deviation | 16.00 | 13.95 | 14.33 | 15.34 | 13.21 | 22.40 | |
| Median | 14.00 | 15.00 | 15.00 | 15.00 | 16.00 | 19.00 | |
| Citrus | *n*=154 | *n*=161 | *n*=140 | *n*=136 | *n*=120 | *n*=118 | |
| Mean (95% CI) | 16.32  (13.80, 18.84) | 17.08  (14.85, 19.31) | 16.21  (14.16, 18.26) | 17.68  (14.89, 20.47) | 15.39  (13.01, 17.76) | 17.82  (14.87, 20.76) | |
| Standard Deviation | 15.97 | 14.42 | 12.37 | 16.61 | 13.28 | 16.33 | |
| Median | 12.00 | 13.00 | 14.00 | 14.00 | 12.92 | 15.00 | |
| Coffee | *n*=135 | *n*=137 | *n*=142 | *n*=145 | *n*=141 | *n*=124 | |
| Mean (95% CI) | 19.31  (16.18, 22.44) | 15.77  (13.43, 18.11) | 17.28  (14.90, 19.65) | 21.63  (18.03, 25.22) | 20.01  (17.10, 22.91) | 21.36  (17.81, 24.91) | |
| Standard Deviation | 18.54 | 13.98 | 14.46 | 22.09 | 17.59 | 20.18 | |
| Median | 15.00 | 12.00 | 13.00 | 16.33 | 16.00 | 16.00 | |
| Mint | *n*=152 | *n*=176 | *n*=171 | *n*=169 | *n*=164 | *n*=156 | |
| Mean (95% CI) | 18.63  (15.66, 21.61) | 18.81  (16.55, 21.07) | 19.20  (16.50, 21.90) | 19.75  (16.92, 22.57) | 20.89  (17.86, 23.92) | 19.82  (17.19, 22.44) | |
| Standard Deviation | 18.69 | 15.29 | 18.01 | 18.75 | 19.80 | 16.74 | |
| Median | 14.00 | 15.00 | 15.40 | 16.00 | 16.50 | 17.00 | |
| Wintergreen | *n*=181 | *n*=185 | *n*=182 | *n*=168 | *n*=164 | *n*=153 | |
| Mean (95% CI) | 19.03  (16.38, 21.68) | 18.97  (16.60, 21.33) | 20.09  (17.56, 22.61) | 19.94  (17.38, 22.49) | 21.48  (18.52, 24.43) | 23.41  (19.91, 26.92) | |
| Standard Deviation | 18.18 | 16.42 | 17.37 | 16.87 | 19.31 | 22.13 | |
| Median | 15.00 | 15.00 | 15.00 | 17.00 | 15.00 | 17.00 | |
| ADU | | | | | | | |
| Original | *n*=128 | *n*=106 | *n*=100 | *n*=83 | *n*=75 | *n*=69 | |
| Mean (95% CI) | 15.45  (12.77, 18.12) | 13.68  (11.51, 15.86) | 17.09  (13.56, 20.61) | 16.63  (12.96, 20.30) | 16.79  (13.66, 19.91) | 20.44  (15.31, 25.56) | |
| Standard Deviation | 15.42 | 11.44 | 17.99 | 17.06 | 13.80 | 21.71 | |
| Median | 12.00 | 10.25 | 11.00 | 10.00 | 15.00 | 14.00 | |
| Berry | *n*=266 | *n*=219 | *n*=192 | *n*=178 | *n*=175 | *n*=154 | |
| Mean (95% CI) | 18.92  (16.96, 20.89) | 18.17  (16.22, 20.12) | 19.25  (16.43, 22.06) | 22.29  (19.31, 25.27) | 19.46  (16.52, 22.40) | 25.99  (21.61, 30.37) | |
| Standard Deviation | 16.37 | 14.71 | 19.90 | 20.31 | 19.85 | 27.75 | |
| Median | 14.00 | 15.00 | 14.00 | 16.00 | 14.00 | 19.00 | |
| Cinnamon | *n*=150 | *n*=147 | *n*=153 | *n*=134 | *n*=132 | *n*=123 | |
| Mean (95% CI) | 17.43  (15.34, 19.52) | 17.58  (15.42, 19.74) | 19.01  (16.64, 21.38) | 21.74  (18.16, 25.32) | 21.72  (18.13, 25.30) | 21.74  (18.24, 25.24) | |
| Standard Deviation | 13.05 | 13.35 | 14.96 | 21.15 | 20.99 | 19.81 | |
| Median | 15.00 | 15.00 | 15.00 | 15.58 | 16.00 | 16.00 | |
| Citrus | *n*=170 | *n*=163 | *n*=147 | *n*=152 | *n*=134 | *n*=138 | |
| Mean (95% CI) | 15.70  (13.57, 17.83) | 18.45  (15.81, 21.09) | 15.97  (13.71, 18.22) | 17.88  (15.15, 20.61) | 17.79  (15.18, 20.39) | 17.75  (14.97, 20.52) | |
| Standard Deviation | 14.17 | 17.22 | 13.94 | 17.17 | 15.41 | 16.63 | |
| Median | 12.00 | 14.00 | 12.00 | 14.00 | 14.00 | 13.00 | |
| Coffee | *n*=168 | *n*=145 | *n*=142 | *n*=140 | *n*=147 | *n*=135 | |
| Mean (95% CI) | 17.31  (15.14, 19.48) | 20.03  (17.31, 22.76) | 21.54  (18.82, 24.27) | 23.14  (19.66, 26.61) | 23.01  (19.56, 26.47) | 24.04  (20.12, 27.96) | |
| Standard Deviation | 14.36 | 16.74 | 16.57 | 20.98 | 21.38 | 23.24 | |
| Median | 13.00 | 15.00 | 18.00 | 15.00 | 17.00 | 17.00 | |
| Mint | *n*=168 | *n*=169 | *n*=170 | *n*=160 | *n*=151 | *n*=142 | |
| Mean (95% CI) | 16.69  (14.58, 18.80) | 17.07  (14.99, 19.15) | 21.42  (18.04, 24.80) | 20.61  (17.27, 23.94) | 21.08  (17.88, 24.29) | 23.66  (19.92, 27.40) | |
| Standard Deviation | 13.95 | 13.81 | 22.51 | 21.51 | 20.10 | 22.74 | |
| Median | 14.00 | 14.00 | 14.50 | 14.00 | 17.00 | 18.00 | |
| Wintergreen | *n*=161 | *n*=166 | *n*=153 | *n*=154 | *n*=165 | *n*=147 | |
| Mean (95% CI) | 19.19  (16.43, 21.95) | 21.05  (17.97, 24.13) | 20.58  (17.42, 23.74) | 23.03  (19.59, 26.48) | 26.29  (22.13, 30.45) | 26.03  (21.52, 30.54) | |
| Standard Deviation | 17.86 | 20.22 | 19.94 | 21.78 | 27.25 | 27.91 | |
| Median | 15.00 | 15.00 | 15.00 | 17.00 | 18.00 | 19.00 | |
| ASTU | | | | | | | |
| Original | *n*=119 | *n*=102 | *n*=100 | *n*=90 | *n*=84 | *n*=62 | |
| Mean (95% CI) | 17.48  (14.56, 20.39) | 19.77  (15.09, 24.46) | 19.75  (14.81, 24.68) | 20.55  (14.86, 26.23) | 20.84  (15.76, 25.92) | 20.74  (14.63, 26.85) | |
| Standard Deviation | 16.23 | 24.16 | 25.20 | 27.51 | 23.76 | 24.56 | |
| Median | 13.00 | 15.00 | 15.00 | 12.00 | 14.50 | 13.50 | |
| Berry | *n*=231 | *n*=177 | *n*=174 | *n*=168 | *n*=157 | *n*=151 | |
| Mean (95% CI) | 19.35  (17.30, 21.39) | 19.50  (16.96, 22.03) | 18.29  (16.08, 20.49) | 18.78  (16.50, 21.06) | 20.19  (17.23, 23.15) | 22.19  (19.13, 25.25) | |
| Standard Deviation | 15.86 | 17.20 | 14.85 | 15.10 | 18.94 | 19.20 | |
| Median | 16.00 | 15.00 | 16.00 | 15.00 | 16.00 | 17.50 | |
| Cinnamon | *n*=127 | *n*=137 | *n*=128 | *n*=130 | *n*=116 | *n*=107 | |
| Mean (95% CI) | 19.45  (16.70, 22.20) | 17.38  (15.11, 19.66) | 18.98  (16.05, 21.90) | 20.83  (17.77, 23.89) | 23.23  (19.05, 27.41) | 23.73  (19.44, 28.03) | |
| Standard Deviation | 15.83 | 13.59 | 16.89 | 17.81 | 22.96 | 22.68 | |
| Median | 17.50 | 16.00 | 15.00 | 18.00 | 18.00 | 20.00 | |
| Citrus | *n=*145 | *n=*147 | *n=*142 | *n=*132 | *n=*126 | *n=*128 | |
| Mean (95% CI) | 19.31  (15.88, 22.73) | 18.52  (15.59, 21.46) | 18.26  (14.97, 21.55) | 18.61  (15.80, 21.42) | 19.85  (16.38, 23.32) | 22.09  (18.43, 25.75) | |
| Standard Deviation | 21.04 | 18.16 | 20.01 | 16.47 | 19.87 | 21.13 | |
| Median | 14.00 | 14.00 | 12.00 | 16.00 | 17.00 | 17.00 | |
| Coffee | *n=*151 | *n=*151 | *n=*132 | *n=*117 | *n=*122 | *n=*113 | |
| Mean (95% CI) | 22.50  (19.18, 25.83) | 20.87  (17.35, 24.38) | 22.56  (18.57, 26.55) | 26.69  (21.70, 31.69) | 24.44  (20.06, 28.83) | 25.14  (20.16, 30.11) | |
| Standard Deviation | 20.84 | 22.04 | 23.39 | 27.59 | 24.71 | 27.00 | |
| Median | 18.00 | 13.00 | 16.00 | 18.00 | 18.00 | 19.00 | |
| Mint | *n=*148 | *n=*149 | *n=*143 | *n=*129 | *n=*132 | *n=*120 | |
| Mean (95% CI) | 18.77  (16.00, 21.55) | 18.67  (16.07, 21.26) | 18.98  (15.96, 22.01) | 21.76  (17.98, 25.54) | 21.55  (17.86, 25.23) | 23.58  (19.42, 27.73) | |
| Standard Deviation | 17.24 | 16.15 | 18.44 | 21.88 | 21.58 | 23.24 | |
| Median | 14.00 | 14.00 | 14.00 | 16.00 | 16.00 | 18.10 | |
| Wintergreen | *n=*129 | *n=*137 | *n=*141 | *n=*138 | *n=*139 | *n=*125 | |
| Mean (95% CI) | 19.76  (16.97, 22.56) | 19.80  (16.72, 22.87) | 21.26  (18.13, 24.39) | 21.65  (17.94, 25.37) | 20.79  (17.64, 23.94) | 25.44  (20.79, 30.09) | |
| Standard Deviation | 16.19 | 18.37 | 18.97 | 22.26 | 18.96 | 26.53 | |
| Median | 16.00 | 17.00 | 16.00 | 15.00 | 17.00 | 20.00 | |
| Additional file 5 legend: Descriptive statistics for Test Products used per week during the 6-week period by flavor for each study group. Data imputation was employed to address missing data. See *Data Analysis* section. CI= confidence interval; AS= Adult Cigarette Smokers; ADU = Adult Dual Users; ASTU =Adult Smokeless Tobacco Product Users. | | | | | | | |
